# Supplementary material
Source: publisher figshare collection journal article supplement (https://sage.figshare.com/ndownloader/files/18109811)
Supplement: Supplementary file 1 [file 18109811]

### My CHATT Items:

1. How much do I **know** about my medical condition(s):
  - a. A LOT! I know about my condition(s), medications I take and why, and outcomes of my condition.
  - b. Some. My caregivers know most.
  - c. Not much.
2. How much information do I **want** to know about my medical condition:
  - a. Please tell me EVERYTHING.
  - b. Only tell me the big things. Give my caregivers all the details.
  - c. Not much.
3. Mark an 'X' in the boxes to let us know what you want to talk about or don't like talking about:
  - a. Possible side effects or risks
  - b. Details of any procedures
  - c. Decisions related to my treatment
  - d. Impact of my condition on my daily activities
  - e. My prognosis
  - f. My wishes for if I become really sick
4. I would like to get medical information by (circle all that apply):
  - a. Someone talking with me
  - b. Written stuff
  - c. Showing me pictures (X-rays, scans, drawings)
  - d. Websites
5. If I have to be in the hospital, I would like to receive medical updates:
  - a. Daily (Choose one: morning, afternoon, evening)
  - b. One or two times a week
  - c. Never. Just tell my caregivers.
  - d. Other:
6. I like when doctors and nurses talk about me:
  - a. In front of me
  - b. Away from me
  - c. Doesn't matter to me
7. I would like medical information told to me by:
  - a. Parent or other family member
  - b. Primary doctor
  - c. Doesn't matter
  - d. Other:
8. If the doctors or nurses have really difficult news to give me:
  - a. I want to be told by my doctor or by:

- b. I want my caregivers to tell me.
  - c. I really don't want to know. Just tell my caregivers if that's okay.
  - d. It depends (Explain):
9. Other things you should know about me (check all that apply):
- a. I like to be told things *as they happen or when my doctors and nurses learn about it*
  - b. I like to be told things *right before it happens* so I don't worry too long
  - c. I sometimes worry that my doctors/caregivers keep things from me
  - d. Other:
10. I would like to talk to my doctor **alone**: Circle **YES** or **NO**
- Questions I have for my doctor:

For information, questions, or permission requests, please contact: Dr. Melissa K. Cousino, PhD  
1500 E. Medical Center Dr. SPC 5718, Ann Arbor, MI 48109  
[melcousi@med.umich.edu](mailto:melcousi@med.umich.edu)  
734-615-2577
